# Supplementary material for: A Case of Submandibular Leiomyosarcoma, Mimicking an Abscess, in a Ball Python (Python regius)
Source: MDPI journal article supplement (doi:10.3390/vetsci8100224), 2021-10-11
Supplement: s1 [file s1]

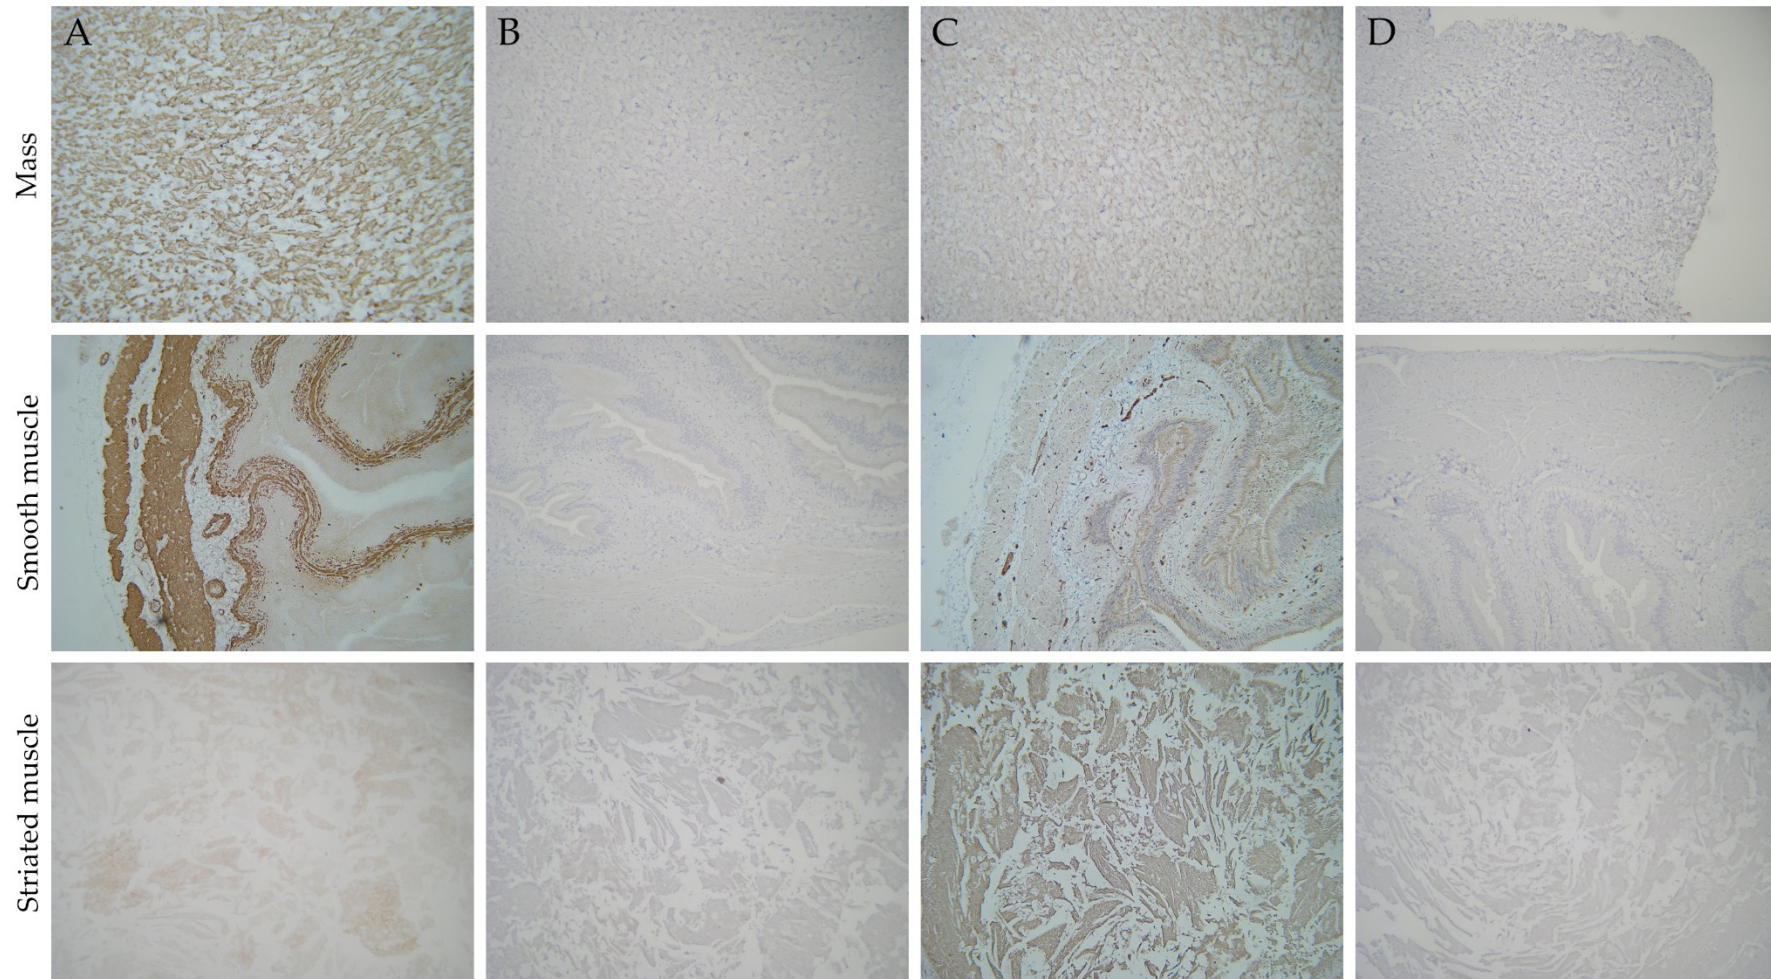

**Figure S1.** Immunohistochemistry of the control samples. IHC results of tumor, smooth muscle (intestine) and striated muscle. **(A)** Smooth muscle actin. Tumor and smooth muscle demonstrated positive. **(B)** Desmin. **(C)** S100. **(D)** Vimentin.
